## Evolution of a minimal cell

2 Moger-Reischer RZ<sup>1</sup>, Glass JI<sup>2</sup>, Wise KS<sup>2</sup>, Sun L<sup>2,3</sup>, Bittencourt D<sup>2,4</sup>, Lynch M<sup>5</sup>, Lennon JT<sup>1,\*</sup>

4 <sup>1</sup> Department of Biology, Indiana University, Bloomington, IN 47405, USA

<sup>2</sup> J. Craig Venter Institute, La Jolla, CA 92037, USA

6 <sup>3</sup> Sorrento Therapeutics, Inc., San Diego, CA 92121 USA

<sup>4</sup> Embrapa Genetic Resources and Biotechnology, Brasília, 70770-917, Brazil

8 <sup>5</sup> Arizona State University, Tempe, AZ 85287, USA

\* Corresponding author: [lennonj@indiana.edu](mailto:lennonj@indiana.edu)

10

### ABSTRACT

12 Possessing only essential genes, a minimal cell can reveal mechanisms and processes that  
14 are critical for the persistence and stability of life. Here, we report on how a synthetically con-  
16 structed minimal cell contends with the forces of evolution compared to a non-minimized cell from  
18 which it was derived. Genome streamlining was costly, but 80% of fitness was regained in 2000  
20 generations. Although selection acted upon divergent sets of mutations, the rates of adaption in the  
minimal and non-minimal cell were equivalent. The only apparent constraint of minimization in-  
volved epistatic interactions that inhibited the evolution of cell size. Together, our findings demon-  
strate the power of natural selection to rapidly optimize fitness in the simplest autonomous organ-  
ism, with implications for the evolution of cellular complexity.

22

## INTRODUCTION

24

The complexity of an organism is reflected in the number of genes it possesses, a quantity that varies by orders of magnitude across the tree of life. While some obligately endosymbiotic bacteria have fewer than 200 protein-coding genes, many plant and animal genomes contain more than 20,000 genes (Lynch 2007). In principle, the simplest organism would have no functional redundancies and possess only the minimum number of genes essential for life. Any mutation in such an organism could lethally disrupt one or more cellular functions, placing constraints on evolution, as reflected in the fact that essential proteins change more slowly than those encoded by dispensable genes (Graur and Li 2000; Hahn and Kern 2005). Furthermore, organisms with streamlined genomes have fewer targets upon which positive selection can act, thus limiting opportunities for adaptation. Understanding how organisms with simplified genomes overcome these evolutionary challenges has important implications for long-standing problems in biology, including the treatment of clinical pathogens, the persistence of host-associated endosymbionts, the refinement of engineered microorganisms, and the origin of life itself (Leprince et al. 2012; Moran and Bennett 2014; Glass et al. 2017).

38

The cell is the simplest independent functional unit of life. Yet even unicellular model organisms that are touted for their tractability are complex, possessing thousands of genes and proteins, many of which remain uncharacterized even after decades of in-depth interrogation. The quest for the simplest organism has been aided by advances in synthetic biology, which involves the redesign or novel construction of biological parts and modules (Benner and Sismour 2005; Glass et al. 2017). Promoted as a way to address practical challenges for society (Cameron et al. 2014; DeLisi 2019), synthetic biology also provides a platform for developing powerful simplest-

46 case models through streamlining, whereby nonessential chromosomal sequences are removed  
from an organism's genome (Leprince et al. 2012; Hutchison et al. 2016; Glass et al. 2017; Rich-  
48 ardsen et al. 2017; Lachance et al. 2019). Guided by such strategies, a “minimal cell” was con-  
structed with a genome containing only the smallest set of genes required for autonomous cellular  
50 life (Hutchison et al. 2016; Breuer et al. 2019). While these efforts succeeded in experimentally  
identifying the genetic requirements for basic cellular processes such as metabolism and cell divi-  
52 sion, it remains unclear how a minimal cell should respond to the forces of evolution, particularly  
given the limited raw materials upon which natural selection can operate as well as the uncharac-  
54 terized input of new mutations.

56 To gain insight into the dynamics and outcomes of evolution in a minimal cell, we con-  
ducted experiments with synthetic strains of *Mycoplasma mycoides* (Hutchison et al. 2016; Breuer  
58 et al. 2019). The minimal cell, *M. mycoides* JCVI-syn3B, was derived from a non-minimal strain,  
*M. mycoides* JCVI-syn1.0, by reducing the chromosome from 901 to 493 genes, resulting in the  
60 smallest genome of any known free-living organism (Hutchison et al. 2016; Breuer et al. 2019).  
With these two strains, we first investigated whether genome minimization, which included the  
62 removal of two DNA replication genes and eight DNA repair genes, altered the rate and spectrum  
of new mutations in the minimal cell relative the non-minimal organism. Second, with knowledge  
64 of the mutational input, we evaluated whether genome minimization altered the rate and mecha-  
nisms of evolution in response to natural selection, as measured using whole-genome sequencing,  
66 estimates of population fitness, and phenotypic changes in cell size.

68

70

## RESULTS AND DISCUSSION

### 72 **Highest recorded mutation rate is robust to genome minimization**

Through serial bottlenecking under relaxed selection, we conducted mutation-accumulation ex-  
74 periments with populations of *Mycoplasma mycoides* (see Methods). The number of mutations per  
nucleotide per generation for the non-minimal cell ( $3.13 \pm 0.12 \times 10^{-8}$ , mean  $\pm$  SEM) was indistin-  
76 guishable from that of the minimal cell ( $3.25 \pm 0.16 \times 10^{-8}$ ) ( $t_{140} = 0.43$ ,  $P = 0.667$ , Fig. 1a). These  
mutation rates, which are the highest recorded for any cellular organism, are consistent with other  
78 reports where organisms with smaller genomes have higher mutation rates (Kuo and Ochman  
2009; Sung et al. 2012; Lynch et al. 2016; Long et al. 2018). For example, *Mesoplasma florum*  
80 also has an exceptionally high mutation rate ( $1.16 \pm 0.07 \times 10^{-8}$ ) (Sung et al. 2012), which may  
reflect the fact that these closely related bacteria both lack mismatch repair, a system for recogniz-  
82 ing and fixing errors that are made during DNA replication (Carvalho et al. 2005). Our data are  
also consistent with predictions from the drift-barrier hypothesis. This theory posits that mutation  
84 rates evolve downward until the selective advantage of another incremental decrease in the muta-  
tion rate is small enough to be effectively neutral and outweighed by genetic drift (Sung et al.  
86 2012; Lynch et al. 2016). In other words, populations with lower effective population size ( $N_e$ )  
experience stronger drift, and hence evolve higher mutation rates (Lynch et al. 2016). Notably, the  
88 natural history (obligate pathogen) and genomic features (small genome size and low GC content)  
of *M. mycoides* and *Me. florum* suggest these mollicute bacteria most likely have low  $N_e$  (Moran  
90 2003; Kuo and Ochman 2009; Hershberg 2015; Long et al. 2018).

### 92 **Small effect of genome minimization on mutational spectrum**

Although the mutation rate was unaffected by minimization, the types of mutations that arise in a

94 population can still influence evolution. Therefore, we compared the spectra of mutations in the  
minimal and non-minimal *M. mycoides*. Overall, the composition of mutation types (insertions,  
96 deletions, and single-nucleotide mutations) was unaffected by genome minimization ( $\chi^2_2 = 4.16$ ,  
 $P = 0.125$ ) (Fig. 1b). Both strains exhibited bias toward deletions over insertions (non-minimal:  
98  $\chi^2_1 = 21.3$ ,  $P = 4.0 \times 10^{-6}$ ; minimal:  $\chi^2_1 = 68.4$ ,  $P < 2.2 \times 10^{-16}$ ), consistent with findings reported  
for other bacteria (Kuo and Ochman 2009; Hershberg 2015; Sung et al. 2016). However, the com-  
100 position of single-nucleotide mutations (SNMs), which constituted the largest category of muta-  
tions (88%), differed between the minimal and non-minimal cell (Monte Carlo  $\chi^2 = 69.9$ ,  $P = 1.0$   
102  $\times 10^{-4}$ ). Mutations from a G or C nucleotide to an A or T nucleotide occurred at a rate ~30-fold  
higher in the non-minimal cell ( $\chi^2_1 = 3736$ ,  $P < 2.2 \times 10^{-16}$ ) and ~100-fold higher in the minimal  
104 cell ( $\chi^2_1 = 1444$ ,  $P < 2.2 \times 10^{-16}$ ) compared to mutations from A or T to G or C (Fig. 1c). As a  
consequence, *M. mycoides* exhibits more A:T bias than any known organism (Hershberg 2015;  
106 Long et al. 2018).

108       There are a few explanations for the extreme A:T mutational bias in the minimal cell. First,  
*M. mycoides* naturally lacks Dut, a dUTPase protein that draws down the intracellular concentra-  
110 tion of dUTP, thereby avoiding its misincorporation into DNA (Tye and Lehman 1977). Because  
adenine would pair with a misincorporated uracil, the lack of Dut should lead to an increased  
112 frequency of A:T-biased mutations in the spectrum of cells without Dut (Sedwick et al. 1986).  
However, since both cells lack Dut, this mechanism is insufficient to explain the discrepancy in  
114 A:T bias between the non-minimal and minimal cells, respectively ( $\chi^2_1 = 21.8$ ,  $P = 3.08 \times 10^{-6}$ ).  
Instead, the difference in A:T bias is more likely due to the removal of *ung* during minimization

116 (Hutchison et al. 2016). This nonessential DNA repair gene encodes for the uracil-DNA glycosyl-  
ase enzyme Ung, which excises ectopic uracils from DNA via hydrolysis. The process results in a  
118 free uracil and an abasic site in the DNA strand (Lindahl et al. 1977), which allows the correct  
nucleotide to be inserted using base complementarity. Without Ung, the uracil would remain in  
120 place and be paired with A during DNA replication, even if the original nucleotide was not T. One  
common cause for the presence of uracil in DNA is the deamination of cytosine (Lindahl 1974).  
122 Thus, a cell lacking *ung* would be enriched in C-to-T mutations when C is replaced by U via  
deamination and U is replaced by T in subsequent DNA replication via base-pairing with A. In the  
124 minimal cell, we observed an excess of these C:G-to-T:A mutations relative to the non-minimal  
bacterium ( $\chi^2_1 = 89.8$ ,  $P = 1.60 \times 10^{-20}$ ), consistent with this aspect of the mutation spectrum being  
126 related to the minimal cell lacking *ung* (Fig. 1c).

### 128 **Rapid recovery of fitness in the minimal cell**

We next considered how populations of the minimal and non-minimal cell would respond to nat-  
130 ural selection. With measured mutation rates of  $\sim 3 \times 10^{-8}$  per nucleotide per generation and popu-  
lation sizes in excess of  $10^7$  individuals, we estimated that a new mutation would hit every nucle-  
132 otide in the genome  $>250$  times during 2000 generations of experimental evolution. Thus, given  
their equal mutation rates per site, populations of either cell type should not be limited by the  
134 availability of genetic variation to fuel adaptation, suggesting that any differences in the ways the  
two strains adapt would be driven by alterations in genome architecture created by minimization.

136

To study natural selection, we passaged replicate populations of *M. mycoides* for  $\sim 2000$   
138 generations (see Methods), a period during which rapid adaptation is often observed (Vasi et al.

1994; Gifford et al. 2011). At the end of the experiment, we measured the fitness (competitive  
140 growth rates) of all ancestors and evolved populations (see Methods). For the ancestral strains, we  
determined that genome minimization led to a 50% reduction in fitness (Fig. 2). Despite this major  
142 initial cost, the minimal cell rapidly regained fitness during the course of evolution. Approximately  
80% of the fitness lost to minimization was recovered during 300 days of serial passaging (Fig. 2).  
144 This suggests that a streamlined *M. mycoides* genome is not inherently crippled and can perform  
almost as well as the non-minimized cell following readaptation.

146

Contrary to our initial predictions, adaptation was not constrained by genome minimization  
148 (Fig. 2). The rate of fitness gain was the same for replicate populations of the non-minimal and  
minimal cells ( $t_6 = 0.40$ ,  $P = 0.704$ , Fig. 2). This interpretation was bolstered by results from pop-  
150 ulation-genomic sequencing (see Methods). The relative ratio of nonsynonymous to synonymous  
fixed SNMs ( $d_N/d_S$ ) did not differ between the two cell types ( $t_6 = 1.18$ ,  $P = 0.859$ , Fig. S1), con-  
152 sistent with the interpretation that the rates of molecular evolution were comparable even though  
all of the genes in the minimal cell are critical for fitness (Graur and Li 2000; Hahn and Kern  
154 2005).

## 156 **Divergent mechanisms of adaptation**

Using a combination of statistical simulation and reverse genetics, we identified mutations that  
158 likely contributed to the observed patterns of adaptation. First, we analyzed the gene-by-population  
matrix for non-synonymous mutations that arose in essential genes during the natural selection  
160 experiment (see Methods). The two cell types acquired mutations in different sets of essential  
genes (PERMANOVA,  $F_7 = 4.12$ ,  $P = 0.029$ , Fig. 3), suggesting that, despite adapting at similar

162 rates, the populations evolved via divergent routes. To explore this hypothesis, we looked for genes  
that acquired a higher number of non-synonymous mutations than expected under assumptions of  
164 neutrality (see Methods). We identified 16 genes in the non-minimal genome and 14 in the minimal  
genome that were potential targets of positive selection (Table 1). Second, we used reverse genet-  
166 ics to experimentally verify that one of the common types of mutation observed in replicate pop-  
ulations of both strains was in fact beneficial (Table S1). Using CRISPR editing, we recreated *ftsZ*  
168 C-terminal nonsense mutations by inserting an *ftsZ* E315\* mutation into the ancestral genomes of  
the minimized and non-minimized strains (see Methods). Competition assays with the constructs  
170 revealed that this putatively adaptive mutation conferred a 25% fitness increase in the non-minimal  
cell and a 14% fitness increase in the minimal cell (Fig. S2).

172

Comparative analysis of genes under positive selection provided insight into the functional  
174 consequences of adaptation in the minimal cell. We hypothesized that mutations in genes related  
to membrane transport would be critical for adaptation because the minimal cell relies on the im-  
176 port and export of metabolites and other biomolecules for metabolism (Antczak et al. 2019; Breuer  
et al. 2019). However, mutations in membrane transport functions were enriched to a similar de-  
178 gree in both cell types over 2000 generations of evolution (Fisher's Exact Test  $P = 0.934$ ). Instead,  
we detected a signal of enrichment for mutations in biosynthetic genes for the minimal cell  
180 (Fisher's Exact Test  $P = 0.090$ ), including those involved in lipid metabolism. Specifically, *fakA*  
and *clsA* (Table 1) are considered essential for synthesizing cardiolipin and other lipids from free  
182 fatty acids (Breuer et al. 2019), which are important for the construction of cell membranes and  
the regulation of cell division. The gene *lgt* is also critical for membrane construction, encoding  
184 the protein that transfers diacylglycerol moieties to anchor surface lipoproteins in the lipid bilayer



(Breuer et al. 2019). Thus, metabolic innovations involving lipid synthesis and distribution may  
186 be more important for the minimal cell than enhanced acquisition of metabolites that are already  
present in the growth medium.

188

### **Genome minimization constrains evolution of cell size**

190 The size of single-celled organisms is variable and often linked to fitness in complex ways (Goun-  
and et al. 2016; Mei et al. 2009; Chien et al. 2012). In resource-rich environments, cell size tends  
192 to be positively correlated with growth rate, one of the most important components of fitness (Vasi  
et al. 1994; Mongold and Lenski 1996; Mei et al. 2009; Chien et al. 2012; Hill et al. 2013). For  
194 example, in the first 2000 generations of a classic long-term evolution experiment, cell volume  
and fitness concomitantly increased by 50% and 30%, respectively (Vasi et al. 1994). While an  
196 increase in size can accommodate more macromolecules needed for growth and division, it also  
decreases a cell's surface-to-volume ratio which increases molecular diffusion times. Given these  
198 opposing pressures, we evaluated how cell size changed in response to genome streamlining over  
the course of evolution. Prior to initiating experiments, we observed that the spherically shaped  
200 non-minimal cell was  $575 \pm 28$  nm (mean  $\pm$  SEM) and the minimal cell was  $422 \pm 23$  nm (see  
Methods), comparable to measures of cell diameter previously reported (Hutchison et al. 2016;  
202 Breuer et al. 2019). Following 2000 generation of evolution, the non-minimal cell exhibited a 73%  
increase in diameter ( $993 \pm 53$  nm,  $t_3 = 7.84$ ,  $P = 0.004$ ) and a corresponding five-fold increase in  
204 volume compared to its ancestor (Fig. 4; Table S2). In contrast, the size of the minimal cell did not  
change during evolution ( $t_3 = 0.85$ ,  $P = 0.459$ ).

206

While cell size is a complex multigenic trait, previous studies have implicated *ftsZ* with

208 changes in morphology of the minimal cell (Pelletier et al. 2021). It encodes for FtsZ, a protein  
that localizes to the midcell and determines the site of membrane constriction during cell division.  
210 Prevalent among diverse lineages of bacteria and archaea (McQuillen and Xiao 2020; Liao et al.  
2021), *ftsZ* is nevertheless nonessential in *M. mycoides*. However, cells lacking *ftsZ* exhibit aber-  
212 rant cell division and morphology (Hutchison et al. 2016; Breuer et al. 2019; Pelletier et al. 2021).  
Thus, along with 18 other nonessential genes, *ftsZ* was retained in JCVI-syn3B to aid in culture  
214 maintenance and stable growth (Breuer et al. 2019; Pelletier et al. 2021). In our study, *ftsZ* was  
consistently mutated over 2000 generations of evolution and was identified as a target of positive  
216 selection in both the minimal and non-minimal cell (Table 1, Fig. S2). Introduction of this termi-  
nation codon could eliminate the C-terminal region of FtsZ, known to interact with membrane-  
218 associated products that recruit FtsZ (Cohan et al. 2020), The early stop codon could also create a  
transcriptional polar effect (Graffeuil et al. 2020) that reduces expression of two adjacent down-  
220 stream genes within a likely polycistronic operon: MMSYN1\_0521, an ortholog of cell division  
protein *sepF* and MMSYN1\_0520, encoding a hydrolase of unknown functions. Irrespective of  
222 mechanism, we demonstrated that mutations in *ftsZ* had a non-additive effect that contributed to  
the evolutionary divergence of cell size. Using scanning electron microscopy, we documented that  
224 the *ftsZ* E315\* nonsense mutation in the ancestral non-minimal cell led to a 25% increase in cell  
diameter ( $t_{118} = 5.56$ ,  $P = 8.71 \times 10^{-8}$ ) and a corresponding two-fold increase in cell volume. In  
226 contrast, the same *ftsZ* nonsense mutation in the ancestral minimal cell led to a 19% decrease in  
the cell diameter ( $t_{122} = 3.29$ ,  $P = 0.001$ , Fig. S4), which reduced cell volume by half. Thus, the  
228 *ftsZ* E315\* mutation recapitulated nearly 60% of the evolved divergence in cell size, indicating  
that FtsZ plays a central role in cell size in *M. mycoides*.

230

Although changes in *ftsZ* had opposing effects on the size of the minimal and non-minimal  
232 cell, mutations in this gene were adaptive for both strains (Fig. S2, Table 1). Smaller cell size may  
be advantageous for the minimal cell. Owing to its slower growth rate, JCVI-syn3B would have  
234 spent more time in an exponential growth phase in our evolution experiment. Some studies have  
shown that smaller cell size is selected for when bacteria evolve under such conditions (Gounand  
236 et al. 2016) even though other studies report a positive association between metabolic rate and  
body mass across species (DeLong et al. 2010). Meanwhile, the faster-growing non-minimal cell  
238 should experience bouts of feast-or-famine over thousands of generations in a serial batch envi-  
ronment. Under such conditions, repeated transitions between exponential and stationary growth  
240 phases has been shown to select for an increase in cell size (Vasi et al. 1994; Gounand et al. 2016).  
The observed patterns may also reflect constraints imposed by genome streamlining on the ability  
242 of the minimal cell to evolve an adaptive increase in cell size (Mei et al. 2009; DeLong et al. 2010;  
Chien et al. 2012; Westfall and Levin 2017). With more than 50% of its membrane transport pro-  
244 teins removed, the minimal cell may be unable to sequester the resources needed for constructing  
and maintaining a larger cell (Chien et al. 2012; Hutchison et al. 2016; Westfall and Levin 2017).  
246 However, one might expect that these biosynthetic constraints would be reflected in a reduced rate  
of adaptation, which was not the case (Fig. 2). In addition, cell size could evolve as a fitness-  
248 neutral byproduct of selection on other traits, such as DNA replication rate (Amir 2017). For ex-  
ample, the two strains could have evolved different size trajectories despite similar selection pres-  
250 sures, due to epistatic effects of genome minimization such as those demonstrated using the *ftsZ*  
E315\* mutants (Table S3, Fig. S4). In any case, our findings highlight that cell size, a fundamental  
252 feature of biological complexity in multicellular and single-celled organisms alike, evolves in a  
way that is highly dependent on genomic context.

254

## Outlook

256 We documented genes, proteins, and traits that are critical for evolutionary performance in the  
synthetically constructed *M. mycoides*, a bacterium with the smallest genome of any self-replicat-  
258 ing form of life. In its ancestral state, this working approximation of a minimal cell had low fitness,  
fewer than 500 protein-coding genes, and the highest mutation rate ever recorded in a cellular  
260 organism. A single gene disruption could have proven lethal. Instead, the force of natural selection  
outweighed any deleterious consequences of mutation and drift that could have led populations to  
262 extinction. Yet, even in one of the simplest organisms, evolution was still complex. Rapid adapta-  
tion involved epistatic interactions and selection on divergent targets, 25% of which encoded for  
264 proteins of unknown function. Evolution studies like the ones described here can improve gene  
characterization and the mapping of regulatory networks, which will inform subsequent rounds of  
266 rational engineering and streamlining. In addition, minimal cells can be leveraged to address long-  
standing problems in biology. Derived from suites of diverse ancestors, they may serve as new  
268 models for investigating innovations of early life (Kacar et al. 2017), while providing bottom-up  
insight into the development of multicellularity (Márquez-Zacarías et al. 2021), the mechanisms  
270 of coevolution (Hillesland and Stahl 2010), and the assembly of multi-species consortia and their  
emergent functions (Goldford et al. 2018).

272

## METHODS

### 274 Strains and growth conditions

We maintained synthetic *Mycoplasma mycoides* JCVI-syn1.0 and synthetic *M. mycoides* JCVI-  
276 syn3B in SP4 medium with KnockOut™ Serum Replacement (Gibco) substituted for fetal bovine

serum (Table S4). Cultures were grown in a dark, static growth chamber at 37 °C. The non-minimal  
278 JCVI-syn1.0 strain has been described in detail elsewhere (2010). The minimal JCVI-syn3B is  
identical to the strain synthesized in previous studies (2016) with the following exceptions: JCVI-  
280 syn3B possesses a second rRNA operon copy, lacks a gene (MMSYN1\_0531) coding for an efflux  
protein, and has 19 genes that were added back into the minimal genome to render the cell easier  
282 to use (Breuer et al. 2019; Pelletier et al. 2021) (Table S5). The strain also contains a landing pad  
system (*Cre* recombinase and *LoxP*) facilitating genetic manipulation. For competition experi-  
284 ments used to quantify relative fitness, we used a JCVI-syn1.0 strain that expresses mCherry,  
which allowed us to distinguish it in mixed culture from other strains via flow cytometry (see  
286 below).

## 288 **Mutation accumulation experiment**

Overview. Mutation accumulation (MA) experiments are designed to reduce the influence of nat-  
290 ural selection through repeated bottlenecks of evolving populations (Lynch et al. 2016). When  
used with microbial populations, this is typically achieved by transferring single colonies, which  
292 have undergone single-cell bottlenecks. Prior to initiating MA experiments, we acclimated JCVI-  
syn1.0 and JCVI-syn3B to laboratory conditions by maintaining populations in SP4 liquid me-  
294 dium. We took a clone of each acclimated strain to begin the MA experiment. We propagated  
replicate MA lineages (JCVI-syn1.0: 87 replicates; JCVI-syn3B: 57 replicates) of each strain for  
296 20 to 36 weekly transfers.

298 Number of generations. In order to compare rates of mutation across replicates, we normalized all  
rates as per-generation values. To calculate the number of generations per transfer in the MA, we

300 grew cells on SP4 agar for one week and diluted a sample of 7<sup>th</sup> day colonies into 1 mL of phosphate-buffered saline (pH = 7.4). Cells were fixed with 20  $\mu$ L of 25% glutaraldehyde and stained  
302 with 2X SYBR Green, and then counted with a NovoCyte flow cytometer (ACEA Biosciences).  
We used the dilutions to calculate the number of cells in the original colony, from which we inferred  
304 the number of generations ( $\log_2(N)$ , where  $N$  is the number of cells in the undiluted colony) that must have occurred to reach a colony of that size (Dillon et al. 2017), assuming each colony  
306 is formed by a single progenitor cell. Because growth rate and other fitness components can decrease during an MA experiment (Behringer and Hall 2016), we also measured the number of cells  
308 per colony during and at the end of the MA, averaging across time points to estimate the total number of generations. We then used the number of generations per transfer to estimate the effective  
310 population size ( $N_e$ ) via the harmonic mean method (Behringer and Hall 2016). Specifically,  $N_e$  was approximated as the harmonic mean of the series ( $2^0, 2^1, 2^2, \dots, 2^f$ ), where  $f$  is equal to the  
312 number of generations per transfer inferred from the previous step.

314 Whole-genome sequencing and sequence analysis. We performed DNA extractions from evolved MA lines using a DNeasy UltraClean Microbial Kit (Qiagen) following the manufacturer's instructions, with the additional step of adding 50  $\mu$ L of 50 mg/mL lysozyme to improve cell lysis.  
316 Genomic DNA was sequenced using Illumina MiSeq sequencing to a depth of  $\geq 35$ X coverage. Library preparation and DNA sequencing were conducted by the Indiana University Bloomington  
318 Center for Genomics and Bioinformatics. Whole-genome sequencing reads were quality controlled using cutadapt (Martin 2011) to trim low-quality base pairs and remove residual adapter  
320 sequences. We used breseq with default parameters (Barrick et al. 2014; Deatherage and Barrick 2014) to call mutations using the trimmed reads. We only considered fixed mutations for the MA  
322

lines. We checked for mutations that had arisen in experimental ancestor strains prior to evolution.  
324 Ancestral mutations were removed from analysis of all evolved lines derived from that strain using  
gdtools (Barrick et al. 2014; Deatherage and Barrick 2014). We used the sequence data to check  
326 for contamination or cross-contamination in evolved lines.

328 Statistical analyses. To compare mutation rate and spectrum between strains, we used two-sample  
*t*-tests for numerical response variables and two-sample  $\chi^2$  tests with continuity correction for com-  
330 paring proportions. For comparing proportions to theoretical expectations within a strain, we used  
one-sample  $\chi^2$  tests with continuity correction.

332

### **Adaptive evolution**

334 Overview. We conducted experiments that allowed bacteria to achieve large population sizes to  
increase the efficacy of natural selection. This involved serial passaging of cells in liquid cultures  
336 with limited bottlenecking at each transfer. For example, in our experiment, the minimum popula-  
tion size was  $2\text{-}4 \times 10^7$  for both JCVI-syn1.0 and JCVI-syn3B. We passaged replicate 3 mL liquid  
338 cultures of each strain ( $n = 4$  per strain) in 13 mm glass culture tubes *via* 1% v/v serial transfer  
each day for 300 days in a dark, static incubator held at 37 °C. We calculated the number of gen-  
340 erations per day as the  $\log_2$  of the dilution factor, i.e.,  $\log_2(101)$ , the number of binary fissions  
needed to regenerate the original population size after the 1% v/v transfer (Lenski and Travisano  
342 1994). Based on this, we estimated that the *M. mycoides* strains were maintained for 1,997 gener-  
ations, which based on other experiments, is long enough for the majority of adaptation to occur  
344 (Lenski and Travisano 1994; Lang et al. 2011).

346 Measurement of fitness. We measured relative fitness by competing ancestral and evolved strains  
against a third-party *M. mycoides* JCVI-syn1.0 strain labeled with mCherry (Wiser and Lenski  
348 2015). Each strain was grown in liquid medium to log phase, and then the labeled and unlabeled  
strains were simultaneously diluted into a mixed culture in fresh medium. The abundances of the  
350 labeled and unlabeled strains in the mixed culture were calculated by immediately ( $t_0$ ) sampling  
the culture, fixing the cells with 20  $\mu$ L of cold 25% glutaraldehyde incubated at 4  $^{\circ}$ C for 20 min,  
352 and staining with 2X SYBR Green. After 24 hr of growth ( $t_f$ ), the mixed culture was sampled again  
in the same manner. We quantified the abundance of each strain using either our Novocyte flow  
354 cytometer (ACEA Biosciences) or an LSR II flow cytometer (BD Biosciences) at Indiana Univer-  
sity's Flow Cytometry Core Facility. The abundance of the strain of interest was calculated from  
356 the observed number of SYBR Green-only positive cells while the abundance of the third-party  
strain was calculated from the number of cells positive for both SYBR Green and mCherry. From  
358 these cell counts, we calculated relative fitness as the change in the relative abundance of the strain  
of interest during the 24 hr period of competitive growth versus the third-party strain. Specifically,  
360 the relative fitness versus the mCherry third-party strain  $W_C$  is

$$W_C = \frac{\ln\left(\frac{N_f}{N_0}\right)}{\ln\left(\frac{N_{cf}}{N_{c0}}\right)}$$

362 where  $N_0$  represents the initial abundance of the focal strain,  $N_f$  the abundance of the focal strain  
after 24 hr, and  $N_{cf}$  and  $N_{c0}$  are final and initial abundances of the mCherry third-party strain,  
364 respectively (Wiser and Lenski 2015). We standardized fitness values to be relative to the original  
*Mm* JCVI-syn1.0 ancestor strain. In other words, we represent the fitness as  $W$ :  $W = \frac{W_C}{W_{JCVI-syn1.0}}$ ,  
366 where  $W_{JCVI-syn1.0}$  is the value of  $W_C$  for *M. mycoides* JCVI-syn1.0. Axenic control cultures were  
always run contemporaneously in order account for a proportion of mCherry-positive cells that



368 failed to detectably express mCherry.

370 Whole-genome sequencing and sequence analysis. DNA extraction, sequencing, and bioinformat-  
ics followed the same methods as for the MA with a few exceptions. Specifically, each replicate  
372 population was sequenced to a depth of  $\geq 100X$  coverage, and polymorphic mutations were in-  
cluded in our analyses. In addition, we calculated  $d_N/d_S$  for evolved lines using the Jukes-Cantor-  
374 corrected equation (Yang 2006) as a possible indicator of molecular constraint among the lines.  
We counted the number of synonymous and nonsynonymous sites using the gdttools module of  
376 breseq (Deatherage and Barrick 2014). The observed numbers of synonymous and nonsynony-  
mous substitutions were obtained directly from breseq outputs. Synonymous and nonsynonymous  
378 polymorphisms were included in the observed count with probability proportionate to their fre-  
quency in mapped reads. We added a pseudocount of 1 synonymous substitution for all calcula-  
380 tions (Shpak et al. 2015) because two of the lines had 0 synonymous substitutions.

382 To identify mutations possibly contributing to adaptation, we looked for genes which had  
mutations in two or more lines. Mutations in the same gene, arising and increasing in frequency in  
384 independent lineages, suggests that mutation's rise could be driven by positive selection (Johnson  
et al. 2021). To test this hypothesis, we statistically assessed whether multiply mutated genes had  
386 acquired more mutations than would be expected by chance under the assumption that the muta-  
tions were neutral (Johnson et al. 2021). To do this, we recorded all of the polymorphic and fixed  
388 mutations that were called within genes. Synonymous mutations were excluded. We then simu-  
lated placing these mutations at random across all genes. The probability of any given gene receiv-  
390 ing any given mutation was proportional to the gene's length and relativized to the gene's GC

content using the known mutation rates of G:C nucleotides and A:T nucleotides from the mutation  
392 accumulation experiment. We repeated this random placement of mutations 100,000 times. In each  
simulation, we counted the number of mutations received by each gene, with each fixed mutation  
394 increasing the count by 1 and each polymorphism counted at a value equal to its frequency. For  
each multiply-mutated gene from the real adaptation experiment, we measured the proportion of  
396 the 100,000 simulations in which the gene received at least as many mutations as were truly ob-  
served and called this proportion the  $P$  value. To correct for the multiple tests (Non-minimal cell:  
398 32; Minimal: 22), we report a Benjamini-Hochberg corrected value  $P_{adj}$  (Benjamini and Hochberg  
1995; Benjamini et al. 2009) for which the false discovery rate  $\alpha = 0.05$  for the reported significant  
400 genes (Table 1).

402 Generation of *ftsZ E315\** mutant cells. This process required mutating the bacterial genomes while  
they were yeast centromeric plasmids (YCPs) followed by genome transplantation of the mutated  
404 genomes. The YCPs were mutated using rounds of CRISPR/Cas9 and yeast homologous recom-  
bination that is a modification of a method we used previously to mutate *M. mycoides* strains  
406 (Kannan et al. 2016).

408 In the first CRISPR/Cas9 step, the molecule to be mutated was cleaved and the donor DNA  
comprising sequences from the two flanking genes was recombined with the cut JCVI-syn1.0 or  
410 JCVI-syn3B YCP, removing parts of genes of the flanking genes and all of the target gene. The  
donor DNA had 40 basepair overlaps to both genes flanking the target gene and had a 22 bp *My-*  
412 *coplasma gallisepticum* 161 CRISPR/Cas9 target sequence with a protospacer adjacent motif  
(PAM) (5'-GTATAAATACATCCAGGAGtgg-3') that had no homology elsewhere in JCVI-

414 syn1.0 or JCVI-syn3B. The *M. gallisepticum* sequence put a new PAM in the genome, employed  
in the second round of CRISPR/Cas9.

416

The second round of CRISPR/CAS9 cut the JCVI-syn1.0 or JCVI-syn3B YCP at the new  
418 *M. gallisepticum* PAM. The cut YCP was then re-circularized using a donor DNA containing the  
desired point mutation. The mutagenized regions of the YCPs were PCR amplified and the muta-  
420 tion was confirmed by Sanger sequencing. Correctly mutagenized JCVI-syn1.0 or JCVI-syn3B  
YCPs were then transplanted into *Mycoplasma capricolum* recipient cells as reported previously  
422 (Lartigue et al. 2007, 2009; Hutchison et al. 2016). The mutagenized regions of the transplants  
were PCR amplified and sequenced to confirm the presence of the desired mutations.

424

Microscopy and image analysis. To compare changes in cell size of evolved populations, we cen-  
426 trifuged stationary-phase cultures and resuspended the pellet in 1 mL of phosphate-buffered saline  
(pH = 7.4). The resuspended cells were fixed by adding 20  $\mu$ L of cold 25% glutaraldehyde and  
428 incubating at 4 °C for 20 min. For microscopic observation, fixed cells were concentrated 50X via  
centrifugation and resuspension. The centrifugation steps were performed at room temperature for  
430 4 min at 2000 g.

432 For phase contrast microscopy, we pipetted 5  $\mu$ L of concentrated culture onto an agarose  
pad (1% agarose in phosphate-buffered saline) and observed cells in the Plan Apo 100X Ph 3  
434 objective lens of a Nikon Eclipse 80i phase contrast microscope. Image data were analyzed using  
MicrobeJ (Ducret et al. 2016). Cell outlines were drawn using default parameters. Area (number  
436 of pixels) within the outline was use as a metric of the area of one face of the spherical cells. Pixel

values were converted to  $\mu\text{m}^2$  using the conversion factor 1 pixel length = 0.0645  $\mu\text{m}$ . Cell diameter  
438 was inferred from this area using the assumption of spherical geometry.

440 Scanning electron microscopy (SEM) was performed at the Indiana University Bloomington  
Electron Microscopy Center. Fixed cells in PBS were pelleted and resuspended in 100 mM  
442 sodium cacodylate buffer (pH = 7.2) with 2 mM calcium chloride and 2% sucrose. We coated 12  
mm diameter glass coverslips with 0.1% poly-L lysine for 5 min, after which coverslips were  
444 washed with a few drops of double distilled water. Resuspended cells were added to the coverslip  
surface and allowed to adhere. After 5 min the coverslips were washed twice with 100 mM sodium  
446 cacodylate buffer (pH = 7.2) with 2 mM calcium chloride and 2% sucrose. Next, 300  $\mu\text{L}$  of 2%  
osmium tetroxide in 100 mM sodium cacodylate buffer (pH = 7.2) with 2% sucrose was added to  
448 the surface of the coverslips while on ice. After 30 minutes the coverslips were washed with double  
distilled water. Coverslips were placed in a CPD coverslip holder (Electron Microscopy Sciences,  
450 catalog number 70193-01). Samples were dehydrated in a graded ethanol series (30%, 50%, 70%,  
90%, 95%) while on ice. At room temperature, coverslips were rinsed three times with 100% eth-  
452 anol. Each dehydration step lasted 2 min. Critical point drying was done using a Tousimis Samdri  
790 critical-point dryer. The dried coverslips were placed on aluminum SEM stubs and sputter  
454 coated, using a Safematic CCU-010 with SP-010 Sputter Head, with 45 nm of gold/palladium  
(80%/20%). We viewed the samples with a FEI Teneo scanning electron microscope at 2.0 kV, 25  
456 pA probe current, and 3.0 mm working distance. The T2 detector was used. We analyzed the SEM  
image data using ImageJ (Schneider et al. 2012). We used the “straight” and “measure” features  
458 combined with image scale metadata to measure the vertical diameters of imaged cells that met  
the following criteria: cells must be round; cells must not have apparent holes or punctures; cells

460 must be completely within the field of view; cells must have an unambiguous perimeter; there  
must be no suggestion that a cell is currently or has recently undergone binary fission; cells must  
462  $\geq 0.1 \mu\text{m}$  across. Each image was processed counterclockwise starting from east. The samples were  
processed in a randomized order.

464

Statistical analyses. We compared relative fitness,  $d_N/d_S$ , and cell size between evolved popula-  
466 tions using two-sample *t*-tests, and to ancestral values using one-sample *t*-tests. We also used two-  
sample *t*-tests to compare the relative fitness and cell size of *ftsZ* E315\* mutants to the respective  
468 ancestral values.

470 We compared the composition of genes acquiring mutations among the evolved replicate  
lines by first constructing a gene-by-population matrix. Herein, each row represented an evolved  
472 line and each column represented a gene that had acquired at least one mutation among all of the  
lines. Each cell of the matrix was filled with the sum value of mutations occurring in that gene in  
474 that line, where fixed mutations were valued at 1 and polymorphisms were valued equal to the  
allele frequency. Only essential genes, shared between JCVI-syn1.0 and JCVI-syn3B, were con-  
476 sidered. We used a permutational multivariate analysis of variance (PERMANOVA) on the Bray-  
Curtis distances generated from the gene-by-population matrix to test for the significance of cell  
478 type (minimal vs. non-minimal) on the composition of mutations using the *adonis* function in the  
R package *vegan* (Oksanen et al. 2020). For visualization, the Bray-Curtis distances were decom-  
480 posed into two dimensions using principal coordinate analysis via the *cmdscale* function.

## ACKNOWLEDGEMENTS

482 We acknowledge financial support from the US National Science Foundation (DEB-1442246 and  
1934554 JTL; MCB-1818344 and 1840320 JIG, LS, and KSW), US Army Research Office Grant  
484 (W911NF-14-1-0411 JTL and ML), the National Aeronautics and Space Administration  
(80NSSC20K0618 JTL), the National Institutes of Health (R35-GM122566-01 and 2017-202  
486 ML), and the Brazilian Agricultural Research Corporation (DMCB). We also acknowledge B.  
Stein for assistance with scanning electron microscopy (NIH 1S10OD023501-01); J. French, E.  
488 Snider, K. McKenzie, B. Lehmkuhl for assistance in the laboratory; and M. Behringer for discus-  
sion regarding sequence analyses. Data and code are available at [https://github.com/Len-  
nonLab/MinimalCell](https://github.com/Len-<br/>490 nonLab/MinimalCell).

## LITERATURE CITED

- 492 Amir, A. 2017. Is cell size a spandrel? *eLife* 6:e22186.
- Antczak, M., M. Michaelis, and M. N. Wass. 2019. Environmental conditions shape the nature of a minimal  
494 bacterial genome. *Nat. Commun.* 10:3100.
- Barrick, J. E., G. Colburn, D. E. Deatherage, C. C. Traverse, M. D. Strand, J. J. Borges, D. B. Knoester, A.  
496 Reba, and A. G. Meyer. 2014. Identifying structural variation in haploid microbial genomes from  
short-read resequencing data using breseq. *BMC Genomics* 15:1039.
- 498 Behringer, M. G., and D. W. Hall. 2016. Genome-wide estimates of mutation rates and spectrum in *Schiz-*  
*osaccharomyces pombe* indicate CpG sites are highly mutagenic despite the absence of DNA meth-  
500 ylation. *G3 Bethesda Md* 6:149–160.
- Benjamini, Y., R. Heller, and D. Yekutieli. 2009. Selective inference in complex research. *Philos. Trans.*  
502 *R. Soc. Math. Phys. Eng. Sci.* 367:4255–4271.
- Benjamini, Y., and Y. Hochberg. 1995. Controlling the false discovery rate: a practical and powerful ap-  
504 proach to multiple testing. *J. R. Stat. Soc. Ser. B Methodol.* 57:289–300.
- Benner, S. A., and A. M. Sismour. 2005. Synthetic biology. *Nat. Rev. Genet.* 6:533–543.
- 506 Breuer, M., T. M. Earnest, C. Merryman, K. S. Wise, L. Sun, M. R. Lynott, C. A. Hutchison, H. O. Smith,  
J. D. Lapek, D. J. Gonzalez, V. de Crécy-Lagard, D. Haas, A. D. Hanson, P. Labhsetwar, J. I. Glass,  
508 and Z. Luthey-Schulten. 2019. Essential metabolism for a minimal cell. *eLife* 8:e36842.
- Cameron, D. E., C. J. Bashor, and J. J. Collins. 2014. A brief history of synthetic biology. *Nat. Rev. Micro-*  
510 *biol.* 12:381–390.
- Carvalho, F. M., M. M. Fonseca, S. Batistuzzo De Medeiros, K. C. Scortecci, C. A. G. Blaha, and L. F.  
512 Agnez-Lima. 2005. DNA repair in reduced genome: the *Mycoplasma* model. *Gene* 360:111–119.
- Chien, A.-C., N. S. Hill, and P. A. Levin. 2012. Cell size control in bacteria. *Curr. Biol.* 22:R340–R349.
- 514 Cohan, M. C., A. M. P. Eddelbuettel, P. A. Levin, and R. V. Pappu. 2020. Dissecting the functional contri-  
butions of the intrinsically disordered C-terminal tail of *Bacillus subtilis* FtsZ. *J. Mol. Biol.*  
516 432:3205–3221.

- Deathage, D. E., and J. E. Barrick. 2014. Identification of mutations in laboratory-evolved microbes from  
518 next-generation sequencing data using breseq. *Methods Mol. Biol.* Clifton NJ 1151:165–188.
- DeLisi, C. 2019. The role of synthetic biology in climate change mitigation. *Biol. Direct* 14:14.
- 520 DeLong, J. P., J. G. Okie, M. E. Moses, R. M. Sibly, and J. H. Brown. 2010. Shifts in metabolic scaling,  
production, and efficiency across major evolutionary transitions of life. *Proc. Natl. Acad. Sci.*  
522 107:12941–12945.
- Dillon, M. M., W. Sung, R. Sebra, M. Lynch, and V. S. Cooper. 2017. Genome-wide biases in the rate and  
524 molecular spectrum of spontaneous mutations in *Vibrio cholerae* and *Vibrio fischeri*. *Mol. Biol.*  
*Evol.* 34:93–109.
- 526 Ducret, A., E. M. Quardokus, and Y. V. Brun. 2016. MicrobeJ, a tool for high throughput bacterial cell  
detection and quantitative analysis. *Nat. Microbiol.* 1:16077.
- 528 Gibson, D. G., J. I. Glass, C. Lartigue, V. N. Noskov, R.-Y. Chuang, M. A. Algire, G. A. Benders, M. G.  
Montague, L. Ma, M. M. Moodie, C. Merryman, S. Vashee, R. Krishnakumar, N. Assad-Garcia,  
530 C. Andrews-Pfannkoch, E. A. Denisova, L. Young, Z.-Q. Qi, T. H. Segall-Shapiro, C. H. Calvey,  
P. P. Parmar, C. A. Hutchison, H. O. Smith, and J. C. Venter. 2010. Creation of a bacterial cell  
532 controlled by a chemically synthesized genome. *Science* 329:52–56.
- Gifford, D. R., S. E. Schoustra, and R. Kassen. 2011. The length of adaptive walks is insensitive to starting  
534 fitness in *Aspergillus nidulans*. *Evol. Int. J. Org. Evol.* 65:3070–3078.
- Glass, J. I., C. Merryman, K. S. Wise, C. A. Hutchison, and H. O. Smith. 2017. Minimal cells—real and  
536 imagined. *Cold Spring Harb. Perspect. Biol.* 9:a023861.
- Goldford, J. E., N. Lu, D. Bajić, S. Estrela, M. Tikhonov, A. Sanchez-Gorostiaga, D. Segrè, P. Mehta, and  
538 A. Sanchez. 2018. Emergent simplicity in microbial community assembly. *Science* 361:469–474.
- Gounand, I., T. Daufresne, D. Gravel, C. Bouvier, T. Bouvier, M. Combe, C. Gougat-Barbera, F. Poly, C.  
540 Torres-Barceló, and N. Mouquet. 2016. Size evolution in microorganisms masks trade-offs pre-  
dicted by the growth rate hypothesis. *Proc. R. Soc. B Biol. Sci.* 283:20162272.



- 542 Graffeuil, A., B. E. Uhlin, and D. A. Cisneros. 2020. “Polar mutagenesis of bacterial transcriptional units  
using Cas12a.” *Microbiology*.
- 544 Graur, D., and W.-H. Li. 2000. *Fundamentals of molecular evolution*. 2nd ed. Sinauer Associates, Sunderland,  
Mass.
- 546 Hahn, M. W., and A. D. Kern. 2005. Comparative genomics of centrality and essentiality in three eukaryotic  
protein-interaction networks. *Mol. Biol. Evol.* 22:803–806.
- 548 Hershberg, R. 2015. Mutation—The engine of evolution: studying mutation and its role in the evolution of  
bacteria. *Cold Spring Harb. Perspect. Biol.* 7:a018077.
- 550 Hill, N. S., P. J. Buske, Y. Shi, and P. A. Levin. 2013. A moonlighting enzyme links *Escherichia coli* cell  
size with central metabolism. *PLoS Genet.* 9:e1003663.
- 552 Hillesland, K. L., and D. A. Stahl. 2010. Rapid evolution of stability and productivity at the origin of a  
microbial mutualism. *Proc. Natl. Acad. Sci.* 107:2124–2129.
- 554 Hutchison, C. A., R.-Y. Chuang, V. N. Noskov, N. Assad-Garcia, T. J. Deerinck, M. H. Ellisman, J. Gill,  
K. Kannan, B. J. Karas, L. Ma, J. F. Pelletier, Z.-Q. Qi, R. A. Richter, E. A. Strychalski, L. Sun, Y.  
556 Suzuki, B. Tsvetanova, K. S. Wise, H. O. Smith, J. I. Glass, C. Merryman, D. G. Gibson, and J. C.  
Venter. 2016. Design and synthesis of a minimal bacterial genome. *Science* 351:aad6253.
- 558 Johnson, M. S., S. Gopalakrishnan, J. Goyal, M. E. Dillingham, C. W. Bakerlee, P. T. Humphrey, T. Jag-  
dish, E. R. Jerison, K. Kosheleva, K. R. Lawrence, J. Min, A. Moulana, A. M. Phillips, J. C. Piper,  
560 R. Purkanti, A. Rego-Costa, M. J. McDonald, A. N. Nguyen Ba, and M. M. Desai. 2021. Pheno-  
typic and molecular evolution across 10,000 generations in laboratory budding yeast populations.  
562 *eLife* 10:e63910.
- Kacar, B., X. Ge, S. Sanyal, and E. A. Gaucher. 2017. Experimental evolution of *Escherichia coli* harboring  
564 an ancient translation protein. *J. Mol. Evol.* 84:69–84.
- Kannan, K., B. Tsvetanova, R.-Y. Chuang, V. N. Noskov, N. Assad-Garcia, L. Ma, C. A. Hutchison III, H.  
566 O. Smith, J. I. Glass, C. Merryman, J. C. Venter, and D. G. Gibson. 2016. One step engineering of  
the small-subunit ribosomal RNA using CRISPR/Cas9. *Sci. Rep.* 6.

- 568 Kuo, C.-H., and H. Ochman. 2009. Deletional bias across the three domains of life. *Genome Biol. Evol.*  
1:145–152.
- 570 Lachance, J.-C., S. Rodrigue, and B. O. Palsson. 2019. Minimal cells, maximal knowledge. *eLife* 8:e45379.
- Lang, Gregory. I., D. Botstein, and M. M. Desai. 2011. Genetic variation and the fate of beneficial mutations  
572 in asexual populations. *Genetics* 188:647–661.
- Lartigue, C., J. I. Glass, N. Alperovich, R. Pieper, P. P. Parmar, C. A. Hutchison, H. O. Smith, and J. C.  
574 Venter. 2007. Genome transplantation in bacteria: changing one species to another. *Science*  
317:632–638.
- 576 Lartigue, C., S. Vashee, M. A. Algire, R.-Y. Chuang, G. A. Benders, L. Ma, V. N. Noskov, E. A. Denisova,  
D. G. Gibson, N. Assad-Garcia, N. Alperovich, D. W. Thomas, C. Merryman, C. A. Hutchison, H.  
578 O. Smith, J. C. Venter, and J. I. Glass. 2009. Creating bacterial strains from genomes that have  
been cloned and engineered in yeast. *Science* 325:1693–1696.
- 580 Lenski, R. E., and M. Travisano. 1994. Dynamics of adaptation and diversification: a 10,000-generation  
experiment with bacterial populations. *Proc. Natl. Acad. Sci. U. S. A.* 91:6808–6814.
- 582 Leprince, A., M. W. van Passel, and V. A. M. dos Santos. 2012. Streamlining genomes: toward the gener-  
ation of simplified and stabilized microbial systems. *Curr. Opin. Biotechnol.* 23:651–658.
- 584 Liao, Y., S. Ithurbide, C. Evenhuis, J. Löwe, and I. G. Duggin. 2021. Cell division in the archaeon *Haloferax*  
*volcanii* relies on two FtsZ proteins with distinct functions in division ring assembly and con-  
586 striction. *Nat. Microbiol.* 6:594–605.
- Lindahl, T. 1974. An N-glycosidase from *Escherichia coli* that releases free uracil from DNA containing  
588 deaminated cytosine residues. *Proc. Natl. Acad. Sci. U. S. A.* 71:3649–3653.
- Lindahl, T., S. Ljungquist, W. Siegert, B. Nyberg, and B. Sperens. 1977. DNA N-glycosidases: properties  
590 of uracil-DNA glycosidase from *Escherichia coli*. *J. Biol. Chem.* 252:3286–3294.
- Long, H., W. Sung, S. Kucukyildirim, E. Williams, S. F. Miller, W. Guo, C. Patterson, C. Gregory, C.  
592 Strauss, C. Stone, C. Berne, D. Kysela, W. R. Shoemaker, M. E. Muscarella, H. Luo, J. T. Lennon,

- 594 Y. V. Brun, and M. Lynch. 2018. Evolutionary determinants of genome-wide nucleotide composition. *Nat. Ecol. Evol.* 2:237–240.
- Lynch, M. 2007. *The origins of genome architecture*. Sinauer Associates, Sunderland, Mass.
- 596 Lynch, M., M. S. Ackerman, J.-F. Gout, H. Long, W. Sung, W. K. Thomas, and P. L. Foster. 2016. Genetic drift, selection and the evolution of the mutation rate. *Nat. Rev. Genet.* 17:704–714.
- 598 Márquez-Zacarías, P., P. L. Conlin, K. Tong, J. T. Pentz, and W. C. Ratcliff. 2021. Why have aggregative multicellular organisms stayed simple? *Curr. Genet.*, doi: 10.1007/s00294-021-01193-0.
- 600 Martin, M. 2011. Cutadapt removes adapter sequences from high-throughput sequencing reads. *EMBnet.journal* 17:10.
- 602 McQuillen, R., and J. Xiao. 2020. Insights into the structure, function, and dynamics of the bacterial cyto-kinetic FtsZ-ring. *Annu. Rev. Biophys.* 49:309–341.
- 604 Mei, Z.-P., Z. V. Finkel, and A. J. Irwin. 2009. Light and nutrient availability affect the size-scaling of growth in phytoplankton. *J. Theor. Biol.* 259:582–588.
- 606 Mongold, J. A., and R. E. Lenski. 1996. Experimental rejection of a nonadaptive explanation for increased cell size in *Escherichia coli*. *J. Bacteriol.* 178:5333–5334.
- 608 Moran, N. A. 2003. Tracing the evolution of gene loss in obligate bacterial symbionts. *Curr. Opin. Microbiol.* 6:512–518.
- 610 Moran, N. A., and G. M. Bennett. 2014. The tiniest tiny genomes. *Annu. Rev. Microbiol.* 68:195–215.
- Oksanen, J., F. G. Blanchet, M. Friendly, R. Kindt, P. Legendre, D. McGlinn, P. R. Minchin, R. B. O’Hara,  
612 G. L. Simpson, P. Solymos, M. H. H. Stevens, E. Szoecs, and H. Wagner. 2020. R package ‘vegan’: community ecology package.
- 614 Pelletier, J. F., L. Sun, K. S. Wise, N. Assad-Garcia, B. J. Karas, T. J. Deerinck, M. H. Ellisman, A. Mershin, N. Gershenfeld, R.-Y. Chuang, J. I. Glass, and E. A. Strychalski. 2021. Genetic requirements for  
616 cell division in a genomically minimal cell. *Cell* S0092867421002932.

- Richardson, S. M., L. A. Mitchell, G. Stracquadanio, K. Yang, J. S. Dymond, J. E. DiCarlo, D. Lee, C. L.  
618 V. Huang, S. Chandrasegaran, Y. Cai, J. D. Boeke, and J. S. Bader. 2017. Design of a synthetic  
yeast genome. *Science* 355:1040–1044.
- 620 Schneider, C. A., W. S. Rasband, and K. W. Eliceiri. 2012. NIH Image to ImageJ: 25 years of image anal-  
ysis. *Nat. Methods* 9:671–675.
- 622 Sedwick, W. D., O. E. Brown, and B. W. Glickman. 1986. Deoxyuridine misincorporation causes site-  
specific mutational lesions in the *lacI* gene of *Escherichia coli*. *Mutat. Res.* 162:7–20.
- 624 Shpak, M., M. M. Goldberg, and M. C. Cowperthwaite. 2015. Rapid and convergent evolution in the Gli-  
oblastoma multiforme genome. *Genomics* 105:159–167.
- 626 Sung, W., M. S. Ackerman, M. M. Dillon, T. G. Platt, C. Fuqua, V. S. Cooper, and M. Lynch. 2016. Evo-  
lution of the insertion-deletion mutation rate across the tree of life. *G3 Genes Genomes Genet.*  
628 6:2583–2591.
- Sung, W., M. S. Ackerman, S. F. Miller, T. G. Doak, and M. Lynch. 2012. Drift-barrier hypothesis and  
630 mutation-rate evolution. *Proc. Natl. Acad. Sci.* 109:18488–18492.
- Tye, B.-K., and I. R. Lehman. 1977. Excision repair of uracil incorporated in DNA as a result of a defect  
632 in dUTPase. *J. Mol. Biol.* 117:293–306.
- Vasi, F., M. Travisano, and R. E. Lenski. 1994. Long-term experimental evolution in *Escherichia coli*. II.  
634 Changes in life-history traits during adaptation to a seasonal environment. *Am. Nat.* 144:432–456.
- Westfall, C. S., and P. A. Levin. 2017. Bacterial cell size: multifactorial and multifaceted. *Annu. Rev.*  
636 *Microbiol.* 71:499–517.
- Wiser, M. J., and R. E. Lenski. 2015. A comparison of methods to measure fitness in *Escherichia coli*.  
638 *PLoS ONE* 10:e0126210.
- Yang, Z. 2006. *Computational molecular evolution*. Oxford University Press, Oxford.
- 640

**Table 1.** Mutations in genes that were identified as being under positive selection during 2000  
642 generations of experimental evolution. Statistical simulations were performed to find genes ac-  
quiring more mutations than expected to occur by chance, indicative of positive selection increas-  
644 ing the allelic proportion of such mutations.  $P_{adj}$  corresponds to significance following Benjamin-  
Hochberg correction to account for multiple comparisons. Genes are assigned to categories based  
646 on the secondary functional classifications (Breuer et al. 2019). Note that “Central metabolism”  
corresponds to “Central carbon metabolism” in the original source (Breuer et al. 2019). While most  
648 nonessential genes are absent from the minimal cell (\*), a few nonessential genes were retained in  
*M. mycoides* JCVI-syn3B to facilitate cultivation and robust growth (†). Uncharacterized genes  
650 did not fall into defined category (N/A). For mutations that were found in both strains, “non” refers  
to non-minimal and “min” refers to minimal.

**Non-minimal cell only**

| Gene        | Annotation                                             | Category           | $P_{adj}$ |
|-------------|--------------------------------------------------------|--------------------|-----------|
| lpdA        | Dihydrolipoyl dehydrogenase                            | Central metabolism | <0.0001   |
| pyk         | Pyruvate kinase                                        | Central metabolism | 0.016     |
| dnaA_1      | Chromosomal replication initiator protein              | DNA maintenance    | 0.0005    |
| ecfT        | ECF transporter T component                            | Membrane transport | <0.0001   |
| Locus 0339* | Na <sup>+</sup> ABC transporter, ATP-binding component | Membrane transport | 0.016     |
| Locus 0030  | Uncharacterized ABC transporter ATP-binding            | Membrane transport | 0.016     |
| rpoA        | DNA-directed RNA polymerase, alpha subunit             | Transcription      | 0.0090    |
| Locus 0187* | Transcriptional regulator, GntR family                 | Transcription      | 0.0098    |
| tnpA_1*     | IS1296 transposase protein A                           | DNA maintenance    | 0.0015    |
| tnpB_1*     | IS1296 transposase protein B                           | DNA maintenance    | 0.0023    |
| Locus 0892* | Putative membrane protein                              | N/A                | 0.016     |

|             |                                         |     |        |
|-------------|-----------------------------------------|-----|--------|
| Locus 0898* | Conserved hypothetical protein          | N/A | 0.029  |
| Locus 0471* | Hypothetical protein                    | N/A | 0.0003 |
| Locus 0751* | Putative viral A-type inclusion protein | N/A | 0.016  |

652

### Minimal cell only

| Gene       | Annotation                                | Category           | $P_{adj}$ |
|------------|-------------------------------------------|--------------------|-----------|
| atpD       | FOF1 ATP synthase subunit beta            | Central metabolism | <0.0001   |
| pyrG       | CTP synthase                              | Central metabolism | 0.0002    |
| dnaN       | DNA polymerase III subunit beta           | DNA maintenance    | <0.0001   |
| lgt        | Diacylglyceryl transferase                | Biosynthesis       | 0.0038    |
| clsA       | Cardiolipin synthase                      | Biosynthesis       | 0.015     |
| fakA       | Fatty acid kinase subunit A               | Biosynthesis       | 0.0025    |
| amiF       | Oligopeptide ABC transporter ATP-binding  | Membrane transport | 0.0036    |
| rpoC       | DNA-directed RNA polymerase, beta subunit | Transcription      | 0.0024    |
| rpsC       | 30S ribosomal protein S3                  | Translation        | 0.021     |
| Locus 0373 | Uncharacterized protein                   | N/A                | 0.015     |
| Locus 0691 | Uncharacterized protein                   | N/A                | 0.027     |
| Locus 0430 | Uncharacterized DNA-binding protein       | N/A                | 0.0012    |

### Minimal and non-minimal cell

| Gene   | Annotation                                   | Category        | $P_{adj}$    |
|--------|----------------------------------------------|-----------------|--------------|
| ftsZ † | Cell division protein ftsZ                   | Cell growth     | non <0.0001  |
|        |                                              |                 | min <0.0001  |
| tetM   | Tetracycline resistance ribosomal protection | Drug resistance | non = 0.029  |
|        |                                              |                 | min = 0.0079 |

654

## FIGURE CAPTIONS

656 **Fig. 1.** Mutation rate and spectrum of the minimal and non-minimal cell estimated from mutation  
accumulation experiments. **(A)** Although *M. mycoides* has the highest recorded mutation rate  
658 (base substitutions and indels), it was not affected by genome minimization. **(B)** The proportions  
of insertions, deletions, and single nucleotide mutations (SNMs) were also the same for the mini-  
660 mal and non-minimal cell. **(C)** Among SNMs, which accounted for 88% of all mutations, the  
minimal cell exhibited a stronger AT bias in its mutation spectrum than the non-minimal cell,  
662 particularly in the C:G-to-A:T category. In this panel, ns = not significant and \*\*\* =  $P < 0.001$ .

664 **Fig. 2.** Genome minimization resulted in a 50% reduction in relative fitness, but 80% of this cost  
was regained over 2000 generations of evolution. Despite removal of nearly half of its genome,  
666 the minimal cell adapted at the same rate as the non-minimal cell. Data represent mean  $\pm$  SEM.  
Because the experiment was initiated with a single clone, error bars for the ancestral time point  
668 were calculated from experimental replicates, while error bars for evolved lines were calculated  
from replicate populations.

670

**Fig. 3.** The non-minimal cell and minimal cell acquired adaptive mutations in different sets of  
672 shared essential genes ( $P = 0.029$ ) over 2000 generations of evolution (Table 1) as depicted in  
ordination from a principal coordinates analysis (PCoA) created with a population x mutation  
674 matrix using Bray-Curtis distance metric. Dashed lines represent 95% confidence ellipses around  
replicate populations (solid symbols).

676

**Fig. 4.** Effect of genome minimization on the evolution of cell size. (A) The size of non-minimal  
678 cells increased by 73% over 2000 generations of evolution, while the size of minimal cell re-  
mained the same. Data represent means  $\pm$  SEM based on images obtained via phase contrast mi-  
680 croscopy. Scanning electron micrographs obtained from evolved replicate populations of the (B)  
non-minimal and (C) minimal cell.



682 **Fig. 1**

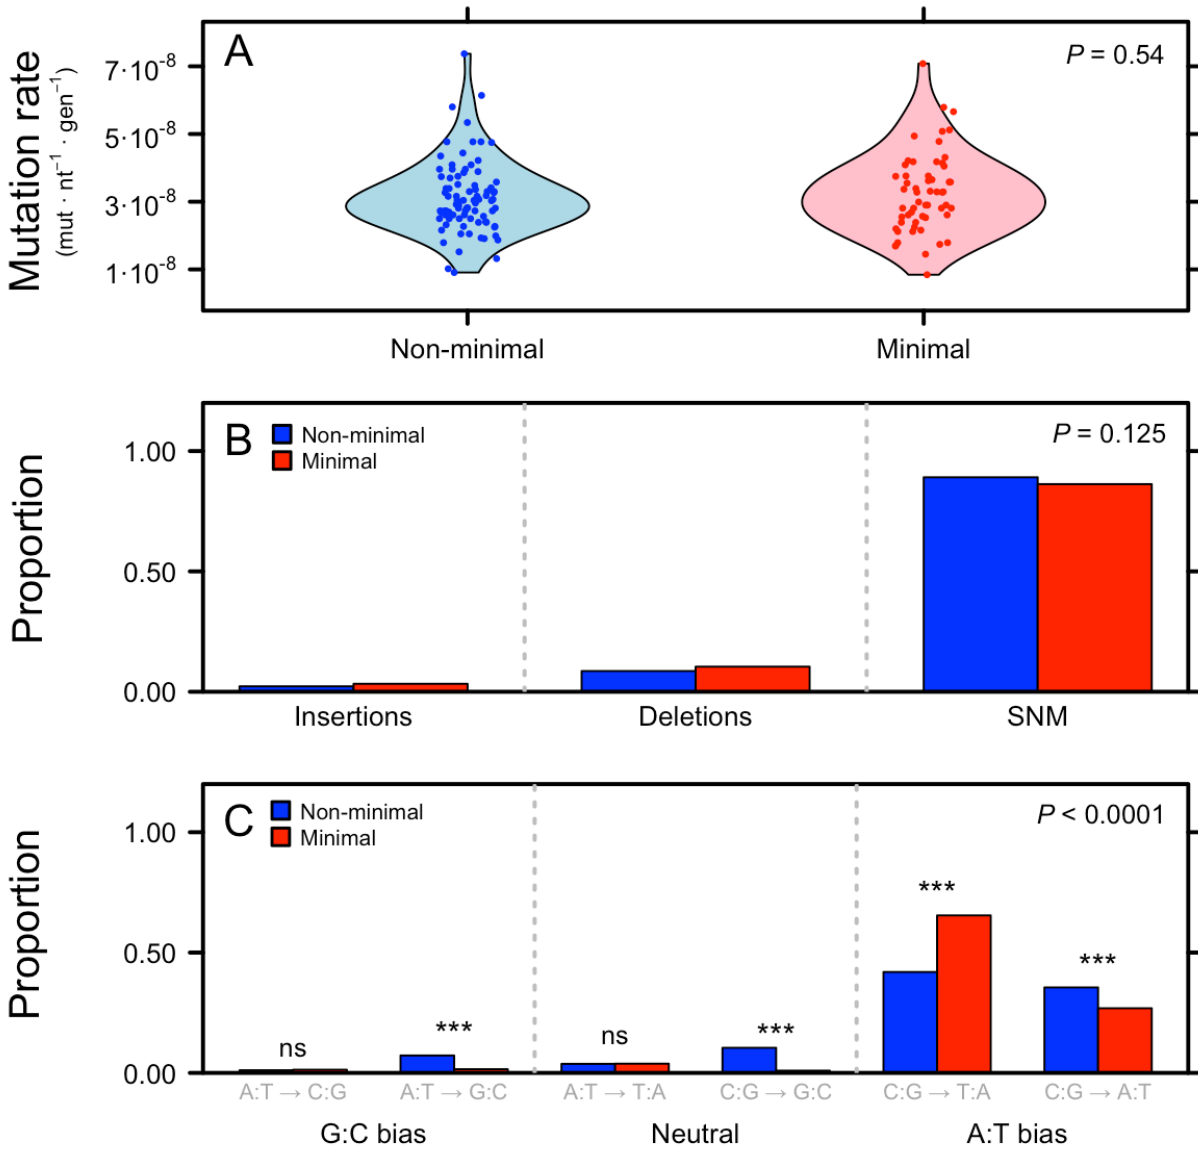

684 Fig. 1. Mutation rate and spectrum of the minimal and non-minimal cell estimated from mutation accumulation experi-  
 686 ments. **(A)** Although *M. mycoides* has the highest recorded mutation rate (base substitutions and indels), it was not  
 688 affected by genome minimization. **(B)** The proportions of insertions, deletions, and single nucleotide mutations  
 (SNMs) were also the same for the minimal and non-minimal cell. **(C)** Among SMNs, which accounted for 88% of all  
 mutations, the minimal cell exhibited a stronger AT bias in its mutation spectrum than the non-minimal cell, particu-  
 larly in the C:G-to-A:T category. In this panel, ns = not significant and \*\*\* =  $P < 0.001$ .

690

**Fig. 2**

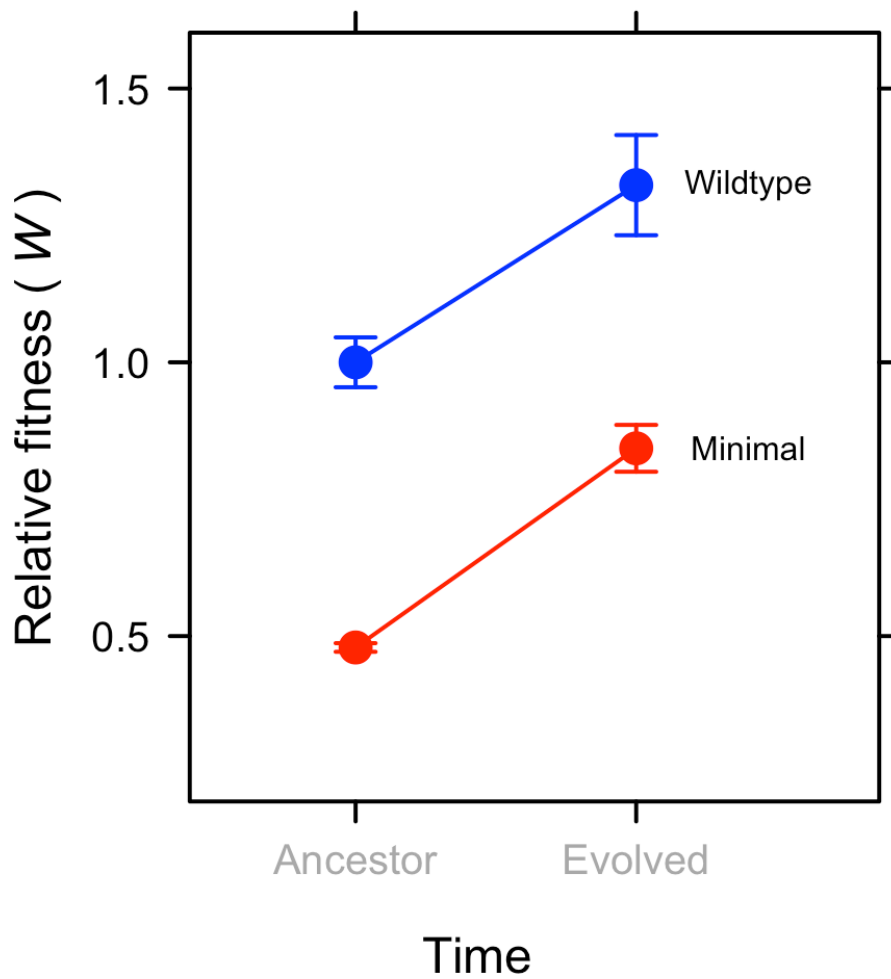

692

694 Fig. 2. Genome minimization resulted in a 50% reduction in relative fitness, but 80% of this cost was regained over  
696 2000 generations of evolution. Despite removal of nearly half of its genome, the minimal cell adapted at the same  
698 rate as the non-minimal cell. Data represent mean  $\pm$  SEM. Because the experiment was initiated with a single clone,  
error bars for the ancestral time point were calculated from experimental replicates, while error bars for evolved lines  
were calculated from replicate populations.

700

702

704

706 **Fig. 3**

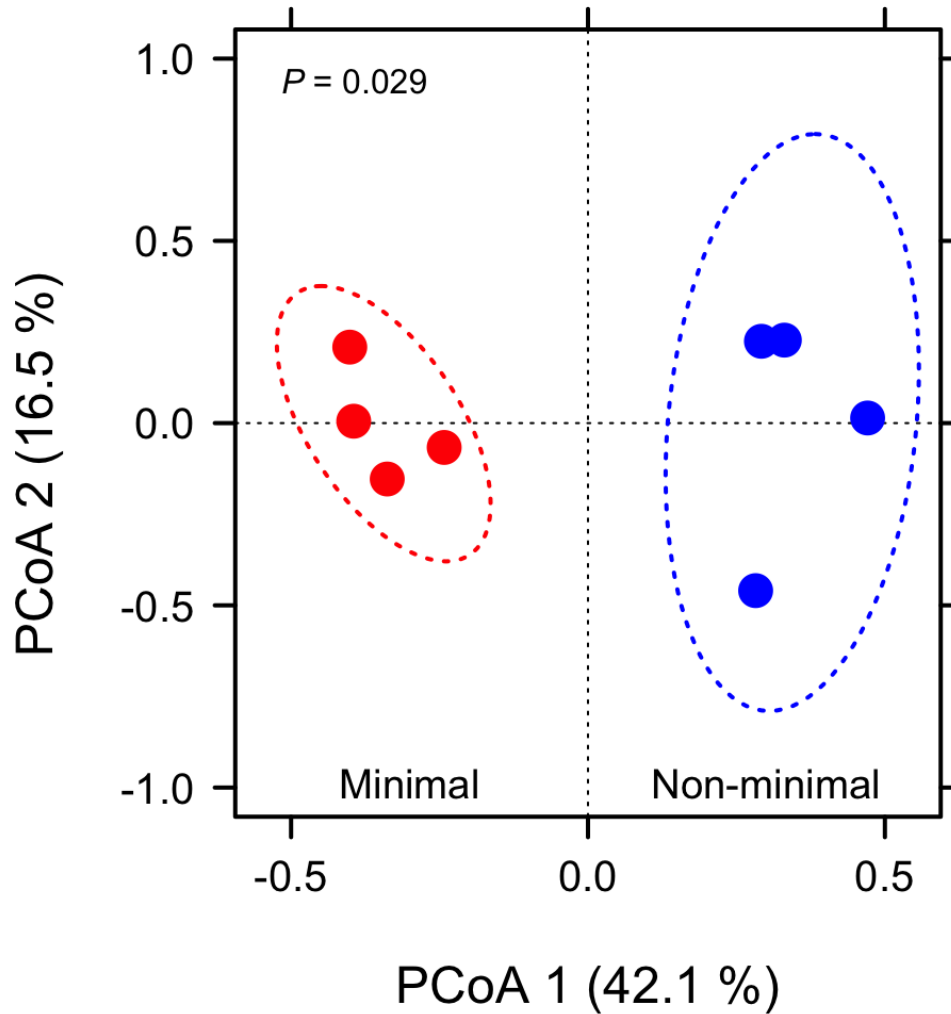

708

710 **Fig. 3.** The non-minimal cell and minimal cell acquired adaptive mutations in different sets of shared essential genes  
712 ( $P = 0.029$ ) over 2000 generations of evolution (Table 1) as depicted in ordination from a principal coordinates analysis (PCoA)  
714 created with a population x mutation matrix using Bray-Curtis distance metric. Dashed lines represent 95% confidence ellipses around replicate populations (solid symbols).

714

716

718

720

722 **Fig. 4**

724

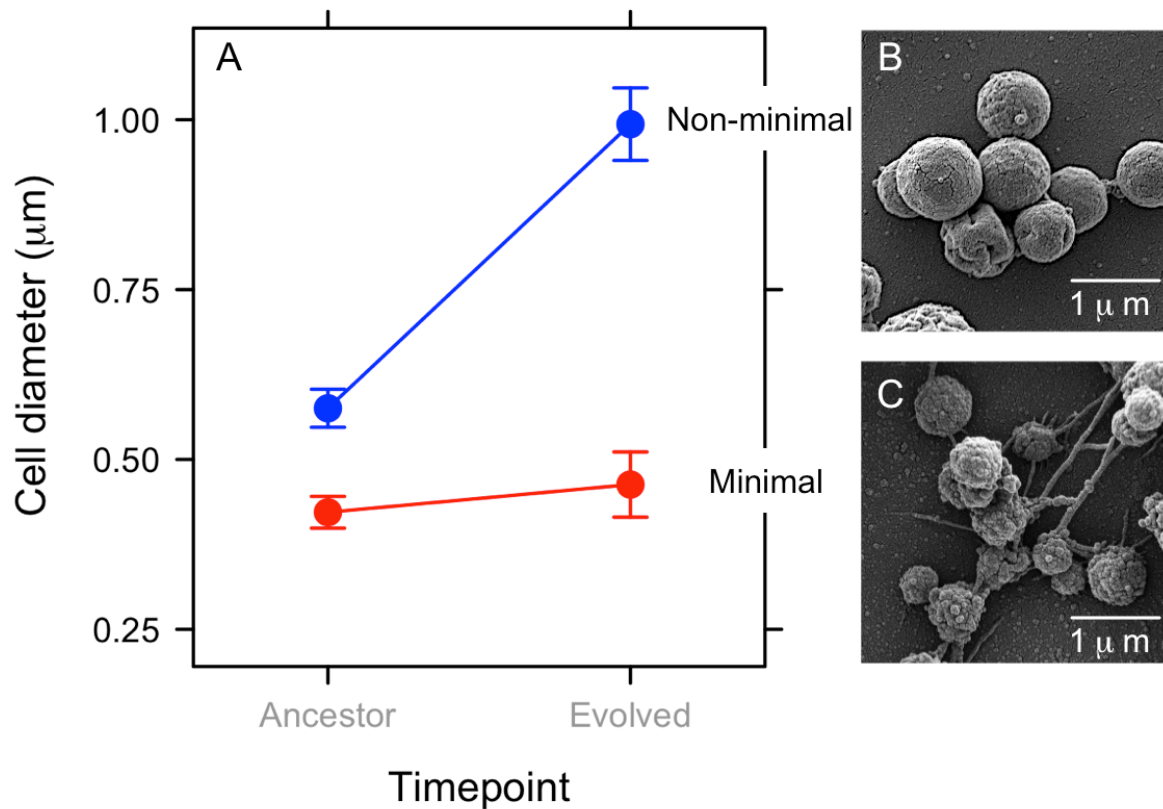

726

728 **Fig. 4.** Effect of genome minimization on the evolution of cell size. (A) The size of non-minimal cells increased by  
730 73% over 2000 generations of evolution, while the size of minimal cell remained the same. Data represent means  $\pm$   
SEM based on images obtained via phase contrast microscopy. Scanning electron micrographs obtained from  
evolved replicate populations of the (B) non-minimal and (C) minimal cell.
